# Supplementary material
Source: PubMed Central journal article supplement (PMC5586078)
Supplement: NIHMS840075-supplement-Appendix_Figure_1.pdf [file NIHMS840075-supplement-Appendix_Figure_1.pdf]

**Appendix Figure 1.** Mean increase in HPV vaccine coverage: intervention facilities compared with non-participating facilities and best practice facilities, June 2013–June 2015.

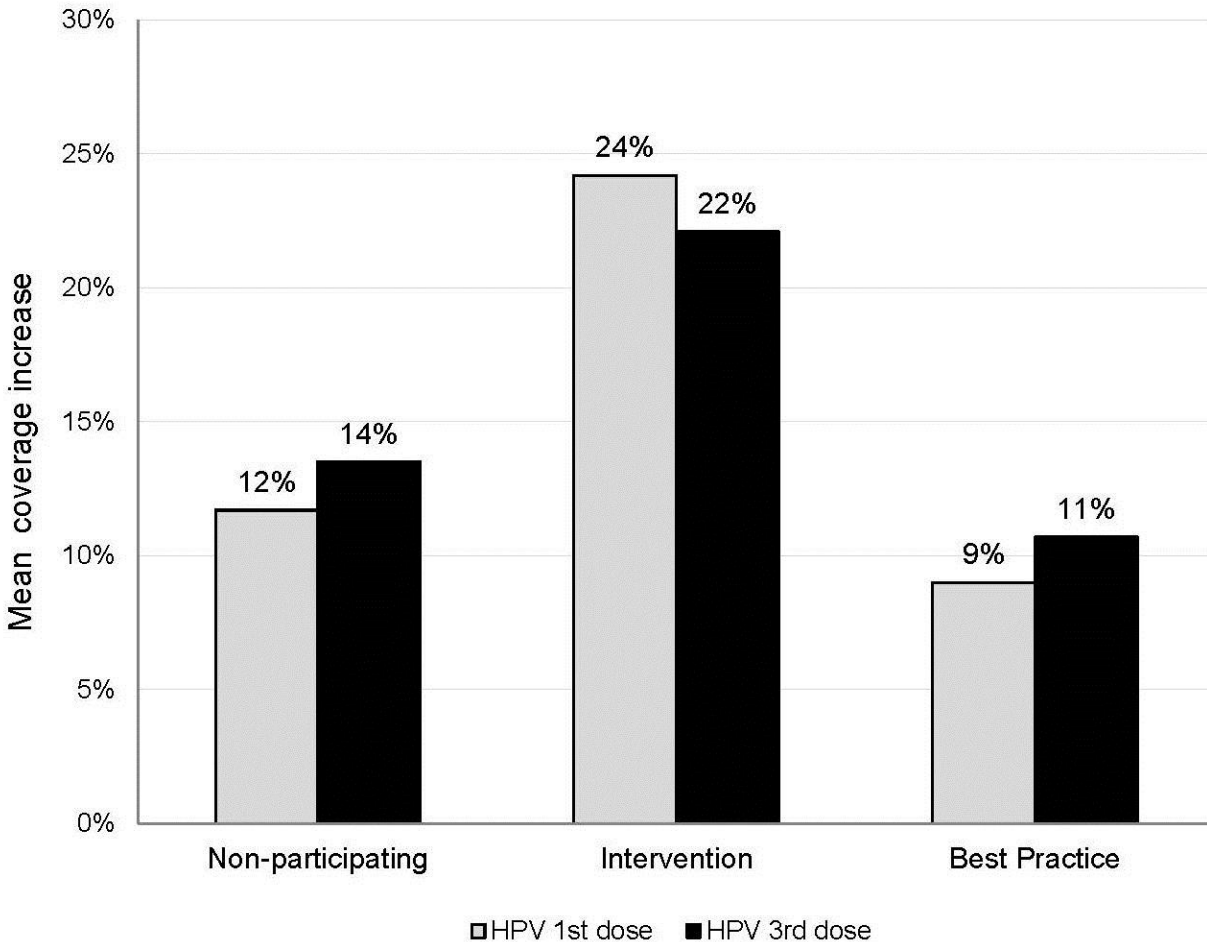

*Notes:* “Non-participating facilities” refers to Indian Health Service, Tribally-operated, and Urban Indian healthcare facilities within the Great Plains, Portland, Nashville, Navajo, and Oklahoma Indian Health Service regions, that were neither considered intervention facilities nor best practice facilities. Facilities missing data from either June 2013 or June 2015 were omitted from the analysis. Mean 13–17 year-old male and female population size from 2013 and 2015 for: 68 non-participating facilities=25,259 people; nine intervention facilities=5,943 people; and nine best practice facilities=6,026 people.

HPV, human papillomavirus
